# Supplementary material for: Exon 6 of human JAG1 encodes a conserved structural unit
Source: PubMed Central journal article supplement (PMC2725086; doi:10.1186/1472-6807-9-43), 2009-07-08
Supplement: 1472-6807-9-43-S1.pdf [file 1472-6807-9-43-S1.pdf]

| Cycle                        | 1    | 2    | 3    | 4    | 5    | 6    | 7    | final |
|------------------------------|------|------|------|------|------|------|------|-------|
| Peaks:                       |      |      |      |      |      |      |      |       |
| selected                     | 922  | 922  | 922  | 922  | 922  | 922  | 922  |       |
| assigned                     | 759  | 812  | 807  | 811  | 807  | 806  | 804  |       |
| unassigned                   | 163  | 110  | 115  | 111  | 115  | 116  | 118  |       |
| Cross peaks:                 |      |      |      |      |      |      |      |       |
| off-diagonal                 | 759  | 812  | 807  | 811  | 807  | 806  | 804  |       |
| unique                       | 261  | 586  | 622  | 635  | 662  | 680  | 680  |       |
| short-range $ i-j  \leq 1$   | 584  | 606  | 600  | 597  | 595  | 588  | 587  |       |
| medium-range $1 <  i-j  < 5$ | 54   | 38   | 41   | 44   | 39   | 41   | 36   |       |
| long-range $ i-j  \geq 5$    | 121  | 168  | 166  | 170  | 173  | 177  | 181  |       |
| Upper limits:                |      |      |      |      |      |      |      |       |
| total                        | 475  | 474  | 466  | 464  | 457  | 458  | 486  | 494   |
| short-range $ i-j  \leq 1$   | 323  | 315  | 308  | 300  | 296  | 292  | 291  | 294   |
| medium-range $1 <  i-j  < 5$ | 83   | 61   | 39   | 41   | 36   | 38   | 40   | 42    |
| long-range $ i-j  \geq 5$    | 69   | 98   | 119  | 123  | 125  | 128  | 155  | 158   |
| Average assign./constr.      | 4.10 | 1.83 | 1.29 | 1.26 | 1.20 | 1.17 | 1.00 | 1.00  |
| Average f value              | 9.10 | 4.90 | 4.44 | 0.87 | 0.63 | 0.46 | 0.41 | 0.38  |
| Average RMSD to mean         |      |      |      |      |      |      |      |       |
| backbone                     | 4.36 | 1.76 | 0.84 | 0.93 | 0.87 | 1.00 | 0.90 | 0.90  |
| heavy atoms                  | 5.23 | 2.53 | 1.47 | 1.62 | 1.50 | 1.60 | 1.50 | 1.57  |
