# Supplementary material for: Exon 6 of human JAG1 encodes a conserved structural unit
Source: PubMed Central journal article supplement (PMC2725086; doi:10.1186/1472-6807-9-43), 2009-07-08

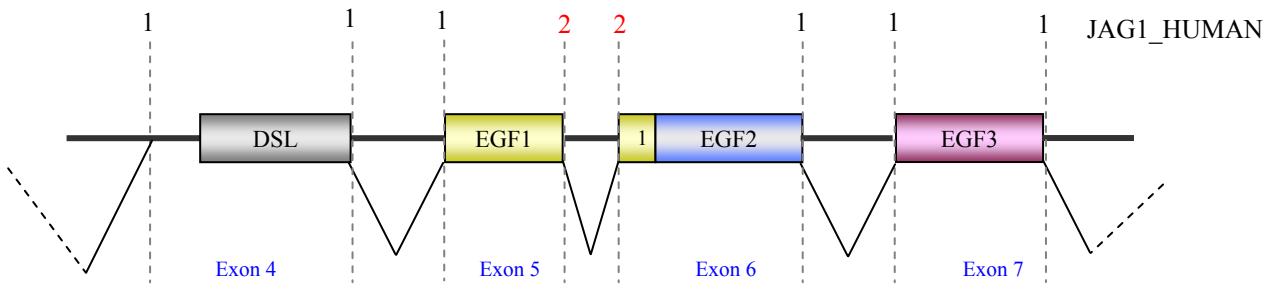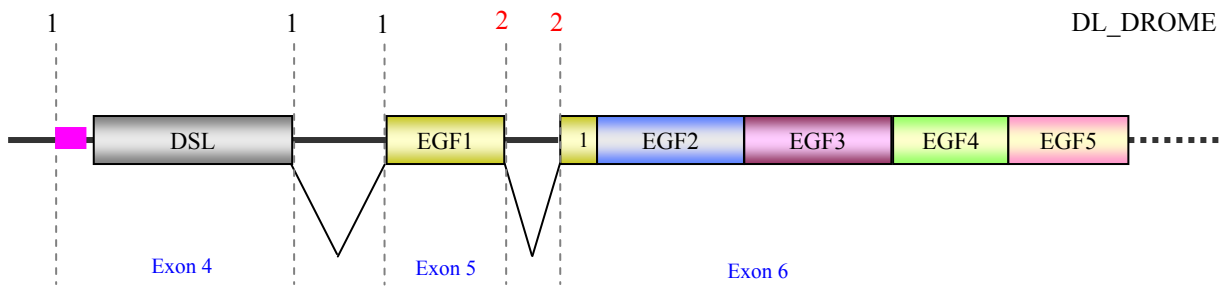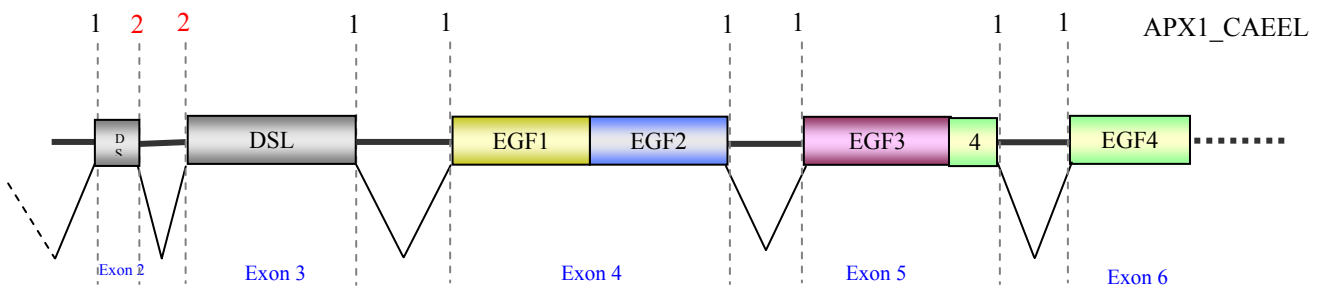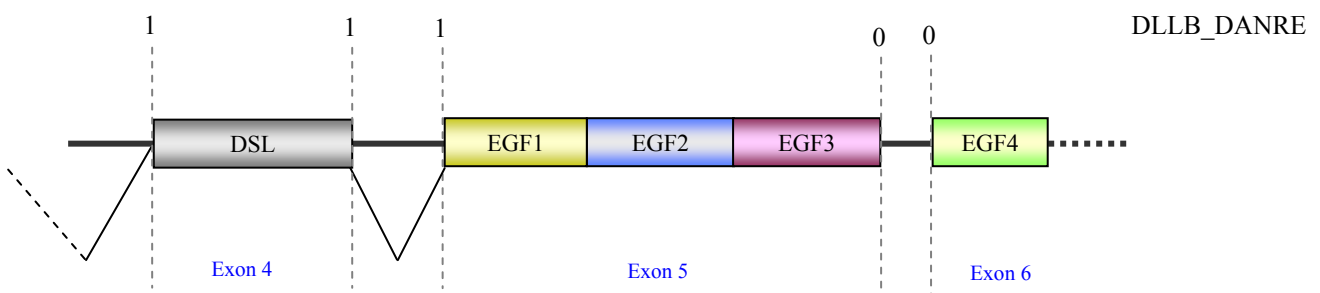

Supplement: 1472-6807-9-43-S5.pdf [file 1472-6807-9-43-S5.pdf]
