# Supplementary material for: Exon 6 of human JAG1 encodes a conserved structural unit
Source: PubMed Central journal article supplement (PMC2725086; doi:10.1186/1472-6807-9-43), 2009-07-08

*JAG1* 6 *Homo sapiens*  
*JAG2* 6 *Homo sapiens*  
*DLL1* 6 *Homo sapiens*  
*DLL4* 6 *Homo sapiens*  
*DLK1* 3 *Homo sapiens*  
*DLK2* 3 *Homo sapiens*  
*JAG1* 4 *Homo sapiens*  
*JAG2* 4 *Homo sapiens*  
*DLL1* 4 *Homo sapiens*  
*DLL4* 4 *Homo sapiens*

```

-RCQYGWQGLYCDK-CIPHPGCV-HGICNEPWQQLCETNWGGQLCDKD
-RC SYGWQGRFCDE-CVPEYFCV-HGSCVEPWQNCETNWGGLLQDKD
-KCRVWQGRY CDE-CIRYFGCL-HGTCQWPWQNCQEGWGLFCNOD
-LCRPGWQGRLCNE-CIPHPGCR-HGTCSTPWQCTDEGWGLFCDD
-RCQPGWQGPLCDO-CVTSEFGCL-HGLCGEPGQCICTDGNDEGLCDRD
-RCDFGWEGLHGER-CVRMEGQ-HGTCHOPWQCIHSGWAGKFCDD
VTDDYYGFGCNKFCRPRDDFFGHYACDQNGNKTCMEGWMGPEC---
VRDENMYSATCNKFCRPRDDFFGHYTCDOYGNKACMDGWMGPEC---
FVDEHYGEGCSVFCRPRDDAFGHFTCGERGEKVCNPGWKGPLYC---
VICSDDNYGCDNCSLCKKRDDHFGHYVQPDGNLSCLPGLTGEYC---

```

“Exon 6”

DSL

A B

*JAG1\_DSL*  
*JAG1\_exon6*

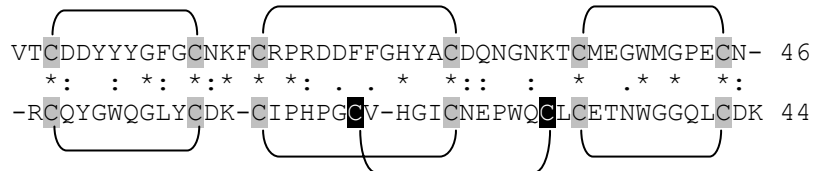

Supplement: 1472-6807-9-43-S8.pdf [file 1472-6807-9-43-S8.pdf]
